# Supplementary material for: Actionability evaluation of biliary tract cancer by genome transcriptome analysis and Asian cancer knowledgebase
Source: PubMed Central journal article supplement (PMC8310666; doi:10.18632/oncotarget.28021), 2021-07-20
Supplement: oncotarget-12-1540-s001.pdf [file oncotarget-12-1540-s001.pdf]

# Actionability evaluation of biliary tract cancer by genome transcriptome analysis and Asian cancer knowledgebase

## SUPPLEMENTARY MATERIALS

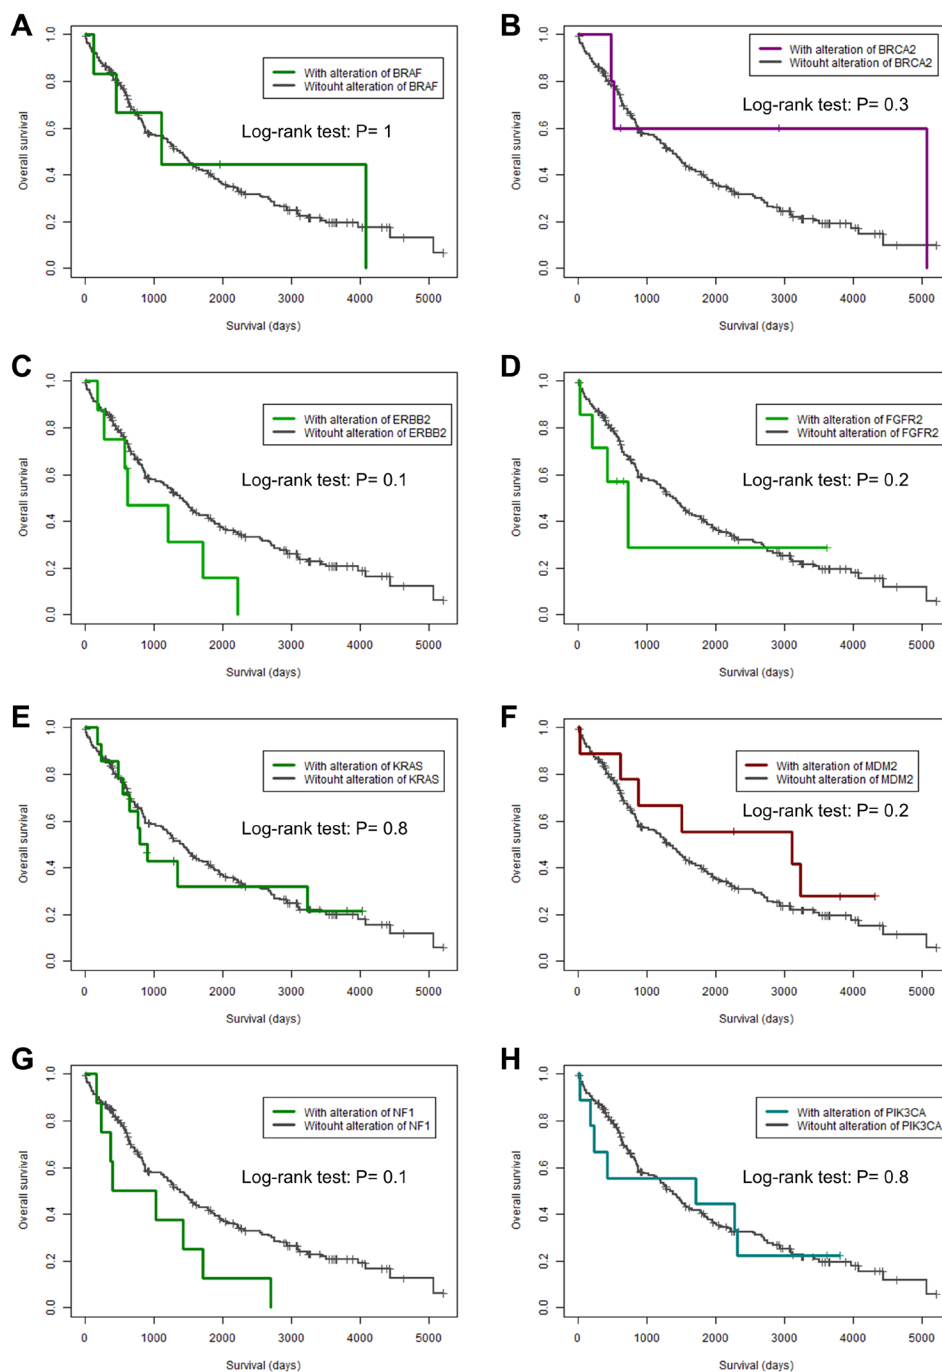

**Supplementary Figure 1: Kaplan–Meier curves for overall survival in actionable genes. (A) *BRAF*, (B) *BRCA2*, (C) *ERBB2*, (D) *FGFR2*, (E) *KRAS*, (F) *MDM2*, (G) *NF1*, (H) *PIK3CA*. The differences in overall survival and relapse-free survival were analyzed by log-rank test;  $P < 0.05$  was considered statistically significant.**

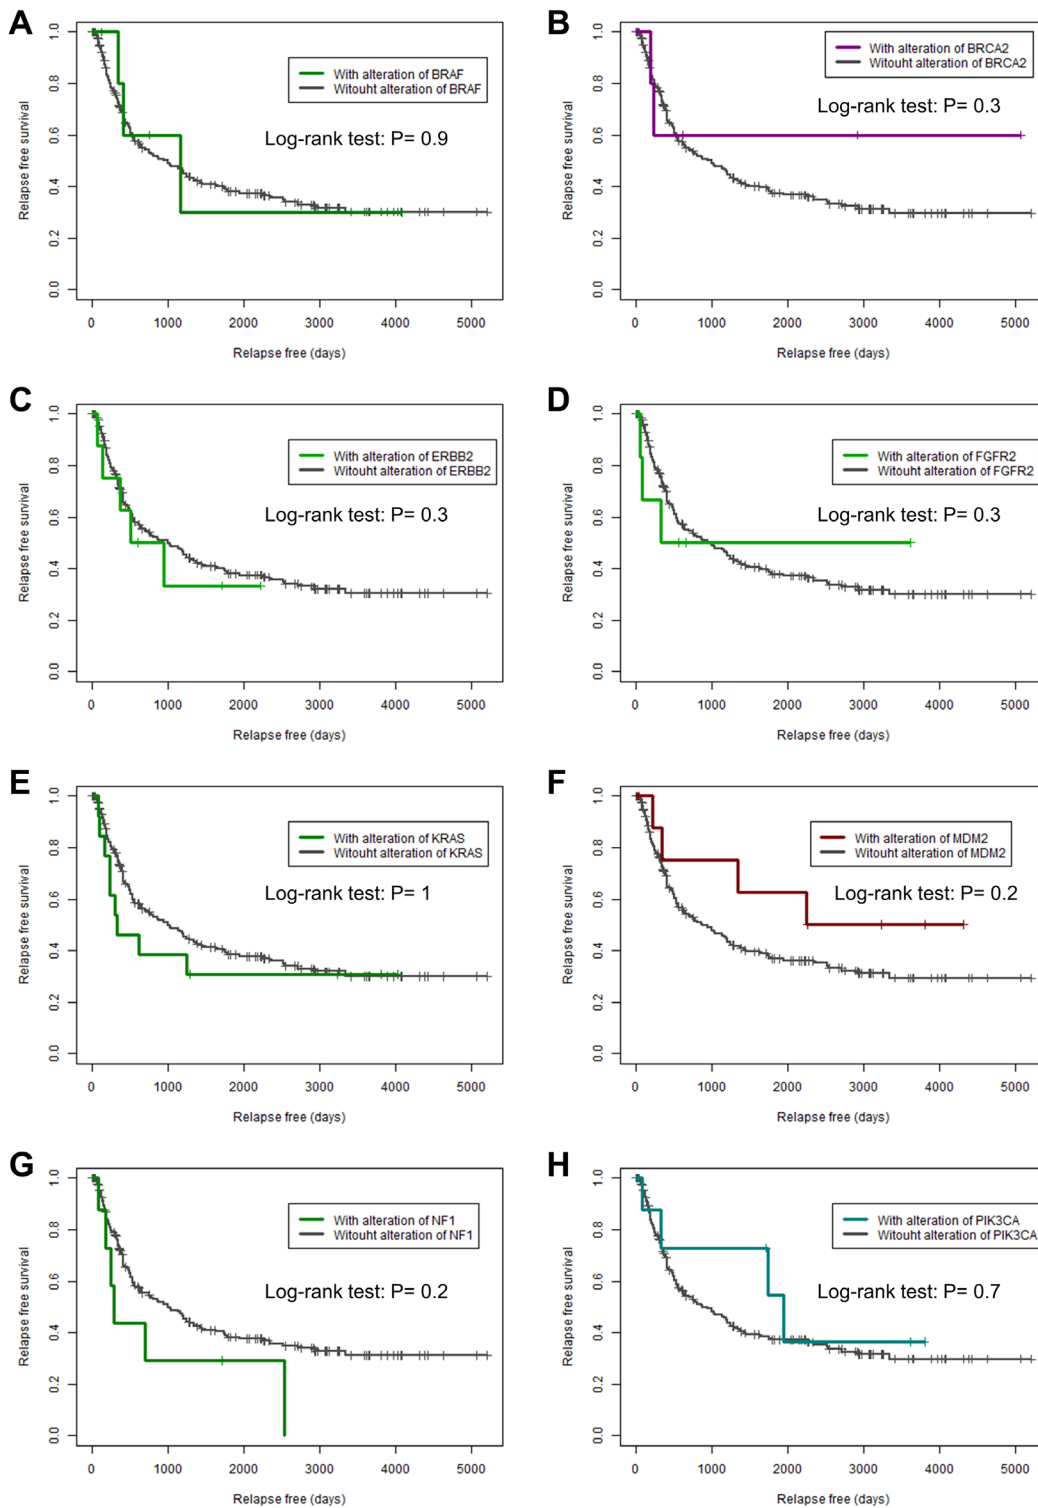

**Supplementary Figure 2: Kaplan–Meier curves for relapse-free survival in actionable genes.** (A) *BRAF*, (B) *BRCA2*, (C) *ERBB2*, (D) *FGFR2*, (E) *KRAS*, (F) *MDM2*, (G) *NF1*, (H) *PIK3CA*. The differences in overall survival and relapse-free survival were analyzed by log-rank test;  $P < 0.05$  was considered statistically significant.

**Supplementary Table 1: Patient clinical data of 218 biliary tract cancer**

| ID    | Sequencing method | Subtype | Gender | Age | Histology                   | pT | pN | pM | pStage | OS (days) | Event of death | RFS (days) | Event of relapse |
|-------|-------------------|---------|--------|-----|-----------------------------|----|----|----|--------|-----------|----------------|------------|------------------|
| RK073 | WGS               | ICC     | M      | 62  | mod                         | 1  | 0  | 0  | 1      | 385       | (-)            | 160        | (+)              |
| RK109 | WGS               | ICC     | M      | 84  | cholangiocellular carcinoma | 2  | 0  | 0  | 2      | 930       | (-)            | 155        | (+)              |
| RK137 | WGS               | ICC     | F      | 74  | mod                         | 3  | 0  | 0  | 3      | 920       | (-)            | 570        | (+)              |
| RK138 | WGS               | ICC     | F      | 75  | por                         | 3  | 0  | 0  | 2      | 242       | (+)            | 92         | (+)              |
| RK142 | WGS               | ICC     | M      | 57  | well                        | 1  | 0  | 0  | 1      | 625       | (-)            | 625        | (-)              |
| RK146 | WGS               | ICC     | F      | 57  | mod                         | 2  | 0  | 0  | 2      | 902       | (-)            | 310        | (+)              |
| RK182 | WGS               | ICC     | M      | 65  | mod                         | 3  | 0  | 0  | 3      | 21        | (+)            | 21         | (-)              |
| RK194 | WGS               | ICC     | M      | 67  | well                        | 3  | 0  | 0  | 3      | 1290      | (-)            | 1290       | (-)              |
| RK204 | WGS               | ICC     | M      | 83  | well                        | 1  | 0  | 0  | 1      | 755       | (-)            | 755        | (-)              |
| RK208 | WGS               | ICC     | M      | 60  | mod                         | 3  | 0  | 0  | 3      | 17        | (-)            | 17         | (-)              |
| RK226 | WGS               | ICC     | M      | 59  | mod                         | 3  | 0  | 0  | 3      | 480       | (-)            | 358        | (+)              |
| RK269 | WGS               | ICC     | M      | 74  | well                        | 1  | 0  | 0  | 1      | 399       | (-)            | 399        | (-)              |
| RK272 | WGS               | ICC     | M      | 78  | mod                         | 2  | 0  | 0  | 2      | 370       | (-)            | 370        | (-)              |
| RK279 | WGS               | ICC     | M      | 69  | mod                         | 3  | 0  | 0  | 3      | 560       | (-)            | 560        | (-)              |
| RK298 | WGS               | ICC     | M      | 68  | por                         | 3  | 0  | 0  | 3      | 440       | (-)            | 440        | (-)              |
| RK303 | WGS               | ICC     | M      | 76  | cholangiocellular carcinoma | 2  | 0  | 0  | 2      | 285       | (-)            | 285        | (-)              |
| RK307 | WGS               | ICC     | F      | 61  | mod                         | 4  | 1  | 0  | 4      | 1286      | (+)            | 500        | (+)              |
| RK308 | WGS               | ICC     | F      | 70  | mod                         | 3  | 0  | 0  | 3      | 3624      | (-)            | 3624       | (-)              |
| RK309 | WGS               | ICC     | M      | 56  | mod                         | 4  | 1  | 0  | 4      | 526       | (+)            | 193        | (+)              |
| RK310 | WGS               | ICC     | F      | 62  | mod                         | 3  | 0  | 0  | 3      | 1782      | (+)            | 321        | (+)              |
| RK312 | WGS               | ICC     | M      | 66  | mod                         | 3  | 1  | 0  | 4      | 525       | (-)            | 130        | (+)              |
| RK316 | WGS               | ICC     | F      | 54  | mod                         | 3  | 3  | 0  | 4      | 240       | (+)            | 90         | (+)              |
| RK317 | WGS               | ICC     | M      | 73  | mod                         | 3  | 0  | 0  | 3      | 28        | (+)            | 28         | (-)              |
| RK353 | WGS               | CDC     | F      | 71  | well                        | 1  | 0  | 0  | 1      | 2235      | (-)            | 2235       | (-)              |
| RK354 | WGS               | CDC     | M      | 61  | mod                         | 3  | 1  | 0  | 4      | 25        | (+)            | 25         | (-)              |
| RK355 | WGS               | CDC     | M      | 68  | mod                         | 3  | 0  | 0  | 3      | 651       | (+)            | 189        | (+)              |
| RK356 | WGS               | CDC     | F      | 84  | mod                         | 3  | 1  | 0  | 4      | 4093      | (+)            | 4093       | (-)              |
| RK357 | WGS               | GBC     | M      | 82  | well                        | 2  | 0  | 0  | 2      | 2228      | (+)            | 2228       | (-)              |
| RK358 | WGS               | CDC     | M      | 76  | mod                         | 2  | 0  | 0  | 2      | 3420      | (-)            | 3420       | (-)              |
| RK359 | WGS               | GBC     | F      | 86  | mod                         | 3  | 3  | 0  | 4      | 277       | (+)            | 134        | (+)              |
| RK360 | WGS               | GBC     | F      | 82  | well                        | 1  | 0  | 0  | 1      | 1718      | (+)            | 1718       | (-)              |
| RK361 | WGS               | GBC     | M      | 63  | adeno-endocrine             | 3  | 1  | 0  | 4      | 648       | (+)            | 536        | (+)              |
| RK362 | WGS               | GBC     | F      | 61  | well                        | 2  | 0  | 0  | 2      | 3073      | (-)            | 3073       | (-)              |
| RK419 | WGS               | DCC     | F      | 71  | mod                         | 3  | 0  | 0  | 3      | 4078      | (-)            | 4078       | (-)              |
| RK420 | WGS               | DCC     | M      | 67  | mod                         | 3  | 1  | 0  | 4      | 540       | (+)            | 173        | (+)              |
| RK421 | WGS               | DCC     | F      | 77  | por                         | 1  | 0  | 0  | 1      | 1614      | (-)            | 1614       | (-)              |
| RK422 | WGS               | DCC     | M      | 70  | por                         | 2  | 0  | 0  | 2      | 2552      | (+)            | 2552       | (-)              |
| RK423 | WGS               | DCC     | M      | 75  | muc                         | 2  | 1  | 0  | 3      | 397       | (+)            | 183        | (+)              |
| RK424 | WGS               | DCC     | M      | 69  | well                        | 2  | 1  | 0  | 3      | 409       | (+)            | 126        | (+)              |
| RK560 | WGS               | GBC     | M      | 51  | mod                         | 2  | 0  | 0  | 2      | 613       | (-)            | 613        | (-)              |

**Supplementary Table 2: The gene list of genetic analysis using genomic DNA**

|         |        |        |       |        |        |        |        |        |        |        |         |        |
|---------|--------|--------|-------|--------|--------|--------|--------|--------|--------|--------|---------|--------|
| ABC1    | BACH1  | CDH1   | DPYD  | FAM175 | FGFR3  | HSPH1  | LRP6   | NBN    | PIK3CB | RET    | SRC     | WEE1   |
| ABCC1   | BAP1   | CDH2   | EGF   | FANCA  | FGFR4  | IDH1   | LTK    | NCOA3  | PIK3CD | RHBDF2 | SRSF2   | WT1    |
| ABCC3   | BARD1  | CDH5   | EGFR  | FANCC  | FLCN   | IDH2   | MAD1L1 | NCOR1  | PIK3CG | RICTOR | STAG2   | XPA    |
| ABCG2   | BCL2   | CDK12  | EML4  | FANCD2 | FLI1   | IDO1   | MAP2K1 | NF1    | PIK3R1 | RIT1   | STAT3   | XPC    |
| ABL1    | BCL2A1 | CDK4   | EP300 | FANCE  | FLT1   | IGF1   | MAP2K2 | NF2    | PIK3R2 | RNF43  | STAT4   | XRCC1  |
| ABL2    | BCL2L1 | CDK6   | EPHA2 | FANCF  | FLT3   | IGF1R  | MAP2K4 | NFKBIA | PKHD1  | ROS1   | STK11   | XRCC2  |
| AKT1    | BCL2L2 | CDK8   | EPHA3 | FANCG  | FLT4   | IGF2   | MAP2K7 | NKX2-1 | PLCG1  | RPS6KB | SUZ12   | XRCC3  |
| AKT2    | BCL6   | CDKN1A | EPHA6 | FANCI  | FOXA1  | IGF2R  | MAP3K1 | NOTCH  | PML    | RPTOR  | SYK     | ZNF217 |
| AKT3    | BCOR   | CDKN1B | EPHA7 | FANCL  | FOXL2  | IKBKE  | MAPK1  | NPM1   | PMS2   | RRAS2  | TBX3    | ZNRF3  |
| ALK     | BCORL1 | CDKN2  | EPHB1 | FANCM  | FOXP1  | IKZF1  | MCL1   | NRAS   | POLE   | RSF1   | TERT    |        |
| APC     | BIRC7  | CDKN2A | EPHB4 | FAT1   | FRS2   | IL1B   | MDM2   | NRG1   | PPARG  | RUNX1  | TET2    |        |
| APCDD1  | BLM    | CDKN2B | EPHB6 | FAT3   | G6PD   | IL7R   | MDM4   | NSD1   | PPP1R1 | SDHAF2 | TFRC    |        |
| APOBEC3 | BRAF   | CDX2   | ERBB2 | FBXW7  | GATA1  | INPP4B | MED12  | NT5C2  | PPP2R2 | SDHB   | TGFBR1  |        |
| AR      | BRCA1  | CEBPA  | ERBB3 | FCGR2B | GATA2  | INSR   | MEN1   | NTRK1  | PRDM1  | SDHC   | TGFBR2  |        |
| ARAF    | BRCA2  | CHD4   | ERBB4 | FGF1   | GATA3  | IRS2   | MET    | NTRK2  | PTCH1  | SDHD   | TMPRS   |        |
| AREG    | BRIP1  | CHEK1  | ERCC1 | FGF10  | GEN1   | ITK    | MITF   | NTRK3  | PTCH2  | SERPIN | TNFAIP3 |        |
| ARID1A  | CALR   | CHEK2  | ERCC2 | FGF14  | GLI2   | JAK1   | MLH1   | PAK1   | PTEN   | SETBP1 | TNFRSF  |        |
| ARID1B  | CARD11 | CHUK   | ERCC3 | FGF18  | GNA11  | JAK2   | MLLT3  | PAK7   | PTPN11 | SETD2  | TNKS    |        |
| ARID2   | CASP8  | CIC    | ERCC4 | FGF19  | GNAQ   | JAK3   | MPL    | PALB2  | PTPRD  | SF3B1  | TOP1    |        |
| ASNS    | CBFB   | CREBB  | ERCC5 | FGF2   | GNAS   | KAT6A  | MRE11A | PARP1  | RAB35  | SH2B3  | TOP2A   |        |
| ASXL1   | CBL    | CSF1R  | ERCC6 | FGF23  | GSTP1  | KCNJ5  | MSH2   | PARP2  | RAC1   | SLC29A | TP53    |        |
| ATM     | CBLB   | CSF3R  | ERG   | FGF3   | H19    | KDM5A  | MSH3   | PARP3  | RAD21  | SLX4   | TPMT    |        |
| ATR     | CCND1  | CTNNB1 | ESR1  | FGF4   | H3F3A  | KDR    | MSH6   | PARP4  | RAD50  | SMAD2  | TSC1    |        |
| ATRX    | CCND2  | CUL4A  | ETS1  | FGF5   | HDAC2  | KIF5B  | MTHFR  | PAX3   | RAD51  | SMAD4  | TSHR    |        |
| AURKA   | CCND3  | CYP17A | ETV1  | FGF6   | HGF    | KIT    | MTOR   | PAX7   | RAD51B | SMARC  | TTF1    |        |
| AURKB   | CCNE1  | DDR2   | ETV4  | FGF7   | HIF1A  | KMT2A  | MUTYH  | PBRM1  | RAD51C | SMO    | TYMS    |        |
| AXIN1   | CD274  | DIS3   | ETV5  | FGF8   | HIST1H | KMT2D  | MYC    | PDCD1L | RAD51D | SOCS1  | U2AF1   |        |
| AXIN2   | CD79A  | DNMT1  | ETV6  | FGF9   | HNF1A  | KRAS   | MYCL1  | PDGFR  | RAD54L | SOX2   | UGT1A1  |        |
| AXL     | CD79B  | DNMT3  | EWSR1 | FGFR1  | HRAS   | LAMP1  | MYCN   | PDPK1  | RAF1   | SPEN   | VEGFA   |        |
| B2M     | CDC73  | DOT1L  | EZH2  | FGFR2  | HSP90A | LRP1B  | MYD88  | PIK3CA | RB1    | SPOP   | VHL     |        |

**Supplementary Table 3: The gene list of transcriptome profiling using RNA. See Supplementary Table 3**

**Supplementary Table 4: Actionable genes in single nucleotide variants and indels**

| <i>Gene</i>   | <i>Patients (n = 219)</i> |         | <i>No of variants</i> | <i>Amino acid substitutions by oncogenic variants</i>                         | <i>Candidate drugs</i>                                                                                                                                       |
|---------------|---------------------------|---------|-----------------------|-------------------------------------------------------------------------------|--------------------------------------------------------------------------------------------------------------------------------------------------------------|
| <i>KRAS</i>   | 11                        | (5 %)   | 11                    | Gly12Asp, Gly12Val, Gly12Ala, Gly12Cys, Ala146Thr                             | Cobimetinib, Binimetinib<br>Trametinib                                                                                                                       |
| <i>NF1</i>    | 7                         | (3.2 %) | 8                     | Gln543X, Gln1763X, Arg1241X, Glu1789X, Arg2517X, Gln1235X, Gln1399X, Arg2450X | Cobimetinib, Trametinib                                                                                                                                      |
| <i>CDKN2A</i> | 5                         | (2.3 %) | 5                     | Asp84Asn, His83Tyr, Arg80X, Ala73fs, Asp84Asn                                 | Abemaciclib, Palbociclib<br>Ribociclib                                                                                                                       |
| <i>PIK3CA</i> | 5                         | (2.3 %) | 5                     | Glu453Lys, Glu545Lys                                                          | Alpelisib + Fulvestrant,<br>Buparlisib Serabelisib,<br>Copanlisib, GDC-0077 Taselisib<br>+ Fulvestrant, Alpelisib,<br>Buparlisib + Fulvestrant,<br>Taselisib |
| <i>BRAF</i>   | 4                         | (1.8 %) | 4                     | Gly466Val, Asp594Asn, Gly469Ala, Lys601Asn                                    | Cobimetinib, PLX8394                                                                                                                                         |
| <i>ERBB2</i>  | 3                         | (1.4 %) | 3                     | Arg678Gln, Leu755Ser, Ser310Phe                                               | Ado-Trastuzumab Emtansine<br>Neratinib, Neratinib                                                                                                            |
| <i>ATM</i>    | 2                         | (0.9 %) | 2                     | Tyr729X, Gln1084X                                                             | Olaparib                                                                                                                                                     |
| <i>IDH1</i>   | 2                         | (0.9 %) | 2                     | Arg132Ser, Arg132Gly                                                          | Ivosidenib                                                                                                                                                   |
| <i>BRCA1</i>  | 1                         | (0.5 %) | 1                     | Glu1107X                                                                      | Rucaparib, Niraparib<br>Talazoparib, Olaparib                                                                                                                |
| <i>BRCA2</i>  | 1                         | (0.5 %) | 1                     | Ser2095X                                                                      | Rucaparib, Niraparib<br>Talazoparib, Olaparib                                                                                                                |

Data are expressed as number (%).

**Supplementary Table 5: Actionable genes in copy number variants**

| Gene          | Alteration | Patients ( <i>n</i> = 219) |         | Candidate drugs                                                                                               |
|---------------|------------|----------------------------|---------|---------------------------------------------------------------------------------------------------------------|
| <i>PTEN</i>   | Loss       | 16                         | (7.3 %) | GSK2636771, AZD8186                                                                                           |
| <i>CDKN2A</i> | Loss       | 10                         | (4.6 %) | Abemaciclib, Palbociclib, Ribociclib                                                                          |
| <i>MDM2</i>   | Gain       | 9                          | (4.1 %) | Milademetan Tosylate, RO5045337                                                                               |
| <i>ERBB2</i>  | Gain       | 5                          | (2.3 %) | Lapatinib + Trastuzumab, Pertuzumab + Trastuzumab Ado-Trastuzumab Emtansine, Lapatinib Neratinib, Trastuzumab |
| <i>CDK4</i>   | Gain       | 4                          | (1.8 %) | Abemaciclib, Palbociclib                                                                                      |
| <i>FGFR3</i>  | Gain       | 4                          | (1.8 %) | AZD4547, Erdafitinib, BGJ398, Debio1347                                                                       |
| <i>PIK3CA</i> | Gain       | 4                          | (1.8 %) | Alpelisib + Fulvestrant                                                                                       |
| <i>ALK</i>    | Gain       | 3                          | (1.4 %) | Brigatinib, Lorlatinib                                                                                        |
| <i>FGFR1</i>  | Gain       | 3                          | (1.4 %) | AZD4547, Erdafitinib, BGJ398, Debio1347                                                                       |
| <i>FGFR2</i>  | Gain       | 3                          | (1.4 %) | AZD4547, Erdafitinib, BGJ398, Debio1347                                                                       |
| <i>KRAS</i>   | Gain       | 3                          | (1.4 %) | Cobimetinib, Binimetinib, Trametinib                                                                          |
| <i>MET</i>    | Gain       | 3                          | (1.4 %) | Crizotinib                                                                                                    |
| <i>BRAF</i>   | Gain       | 2                          | (0.9 %) | Cobimetinib                                                                                                   |
| <i>BRCA2</i>  | Loss       | 2                          | (0.9 %) | Rucaparib, Niraparib                                                                                          |
| <i>EGFR</i>   | Gain       | 2                          | (0.9 %) | Lapatinib                                                                                                     |
| <i>FLT3</i>   | Gain       | 2                          | (0.9 %) | Midostaurin + High Dose Chemotherapy                                                                          |
| <i>BRCA1</i>  | Loss       | 1                          | (0.5 %) | Rucaparib, Niraparib                                                                                          |
| <i>HRAS</i>   | Gain       | 1                          | (0.5 %) | Tipifarnib                                                                                                    |
| <i>NF1</i>    | Loss       | 1                          | (0.5 %) | Cobimetinib, Trametinib                                                                                       |
| <i>TSC1</i>   | Loss       | 1                          | (0.5 %) | Everolimus                                                                                                    |

Data are expressed as number (%).

**Supplementary Table 6: Actionable genes in fusions**

| Gene                 | Patients ( <i>n</i> = 219) |         | No. of fusion | Candidate drugs                         |
|----------------------|----------------------------|---------|---------------|-----------------------------------------|
| <i>CASP7-FGFR2</i>   | 2                          | (0.9 %) | 4             | Erdafitinib                             |
| <i>ERC1-FGFR1</i>    | 1                          | (0.5 %) | 1             | AZD4547, BGJ398, Erdafitinib, Debio1347 |
| <i>VCL-FGFR2</i>     | 1                          | (0.5 %) | 3             | Erdafitinib                             |
| <i>BICC1-FGFR2</i>   | 1                          | (0.5 %) | 3             | AZD4547, Erdafitinib, BGJ398, Debio1347 |
| <i>PLEKHS1-FGFR2</i> | 1                          | (0.5 %) | 3             | Erdafitinib                             |
| <i>ABLIM1-FGFR2</i>  | 1                          | (0.5 %) | 1             | Erdafitinib                             |

Data are expressed as number (%).

**Supplementary Table 7: Candidate drugs annotated in patients with biliary tract cancer**

| Candidate drugs                      | Actionable gene        | Patients (n = 219) |          |
|--------------------------------------|------------------------|--------------------|----------|
| Cobimetinib                          | <i>BRAF, KRAS, NF1</i> | 25                 | (11.4 %) |
| Trametinib                           | <i>NF1</i>             | 19                 | (8.7 %)  |
| Abemaciclib                          | <i>CDK4, CDK2A</i>     | 18                 | (8.2 %)  |
| Palbociclib                          | <i>CDK4, CDKN2A</i>    | 18                 | (8.2 %)  |
| AZD8186                              | <i>PTEN</i>            | 16                 | (7.3 %)  |
| GSK2636771                           | <i>PTEN</i>            | 16                 | (7.3 %)  |
| Erdafitinib                          | <i>FGFR1/2/3</i>       | 15                 | (6.8 %)  |
| Ribociclib                           | <i>CDKN2A</i>          | 15                 | (6.8 %)  |
| Cetuximab                            | <i>KRAS</i>            | 14                 | (6.4 %)  |
| Panitumumab                          | <i>KRAS</i>            | 14                 | (6.4 %)  |
| AZD4547                              | <i>FGFR1/2/3</i>       | 12                 | (5.5 %)  |
| BGJ398                               | <i>FGFR1/2/3</i>       | 12                 | (5.5 %)  |
| Debio1347                            | <i>FGFR1/2/3</i>       | 12                 | (5.5 %)  |
| Binimetinib                          | <i>KRAS</i>            | 11                 | (5 %)    |
| Alpelisib + Fulvestrant              | <i>PIK3CA</i>          | 9                  | (4.1 %)  |
| Milademetan Tosylate                 | <i>MDM2</i>            | 9                  | (4.1 %)  |
| RO5045337                            | <i>MDM2</i>            | 9                  | (4.1 %)  |
| Ado-Trastuzumab Emtansine            | <i>ERBB2</i>           | 8                  | (3.7 %)  |
| Neratinib                            | <i>ERBB2</i>           | 8                  | (3.7 %)  |
| Niraparib                            | <i>BRCA1/2</i>         | 8                  | (3.7 %)  |
| Rucaparib                            | <i>BRCA1/2</i>         | 8                  | (3.7 %)  |
| Lapatinib                            | <i>ERBB2, EGFR</i>     | 7                  | (3.2 %)  |
| Olaparib                             | <i>ATM, BRCA1/2</i>    | 7                  | (3.2 %)  |
| Alpelisib                            | <i>PIK3CA</i>          | 5                  | (2.3 %)  |
| Buparlisib                           | <i>PIK3CA</i>          | 5                  | (2.3 %)  |
| Buparlisib + Fulvestrant             | <i>PIK3CA</i>          | 5                  | (2.3 %)  |
| Copanlisib                           | <i>PIK3CA</i>          | 5                  | (2.3 %)  |
| GDC-0077                             | <i>PIK3CA</i>          | 5                  | (2.3 %)  |
| Lapatinib + Trastuzumab              | <i>ERBB2</i>           | 5                  | (2.3 %)  |
| Pertuzumab + Trastuzumab             | <i>ERBB2</i>           | 5                  | (2.3 %)  |
| Serabelisib                          | <i>PIK3CA</i>          | 5                  | (2.3 %)  |
| Talazoparib                          | <i>BRCA1/2</i>         | 5                  | (2.3 %)  |
| Taselisib                            | <i>PIK3CA</i>          | 5                  | (2.3 %)  |
| Taselisib + Fulvestrant              | <i>PIK3CA</i>          | 5                  | (2.3 %)  |
| Trastuzumab                          | <i>ERBB2</i>           | 5                  | (2.3 %)  |
| Brigatinib                           | <i>ALK</i>             | 3                  | (1.4 %)  |
| Crizotinib                           | <i>MET</i>             | 3                  | (1.4 %)  |
| Lorlatinib                           | <i>ALK</i>             | 3                  | (1.4 %)  |
| Ivosidenib                           | <i>IDH1</i>            | 2                  | (0.9 %)  |
| Midostaurin + High Dose Chemotherapy | <i>FLT3</i>            | 2                  | (0.9 %)  |
| Everolimus                           | <i>TSC1</i>            | 1                  | (0.5 %)  |
| PLX8394                              | <i>BRAF</i>            | 1                  | (0.5 %)  |
| Tipifarnib                           | <i>HRAS</i>            | 1                  | (0.5 %)  |

Data are expressed as number (%).

**Supplementary Table 8: Comparison between actionable genes and sex**

|                   | Male <i>n</i> = 159 |        | Female <i>n</i> = 60 |       | <i>P</i> -value | OR   | 95% CI        |
|-------------------|---------------------|--------|----------------------|-------|-----------------|------|---------------|
| Actionability (+) | 50                  | (31.4) | 24                   | (40)  | 0.3             | 0.69 | (0.37–1.27)   |
| <i>ALK</i>        | 1                   | (0.6)  | 2                    | (3.3) | 0.18            | 0.19 | (0–3.62)      |
| <i>ATM</i>        | 2                   | (1.3)  | 0                    | (0)   | 1               | Inf  | #VALUE!       |
| <i>BRAF</i>       | 3                   | (1.9)  | 3                    | (5)   | 0.35            | 0.37 | (0.05–2.82)   |
| <i>BRCA1</i>      | 1                   | (0.6)  | 1                    | (1.7) | 0.47            | 0.38 | (0–29.8)      |
| <i>BRCA2</i>      | 3                   | (1.9)  | 0                    | (0)   | 0.56            | Inf  | (0.16-Inf)    |
| <i>CDK4</i>       | 1                   | (0.6)  | 3                    | (5)   | 0.06            | 0.12 | (0–1.55)      |
| <i>CDKN2A</i>     | 10                  | (6.3)  | 5                    | (8.3) | 0.56            | 0.74 | (0.22–2.88)   |
| <i>EGFR</i>       | 2                   | (1.3)  | 0                    | (0)   | 1               | Inf  | (0.07-Inf)    |
| <i>ERBB2</i>      | 4                   | (2.5)  | 4                    | (6.7) | 0.22            | 0.36 | (0.07–2.02)   |
| <i>FGFR1</i>      | 2                   | (1.3)  | 2                    | (3.3) | 0.3             | 0.37 | (0.03–5.23)   |
| <i>FGFR2</i>      | 6                   | (3.8)  | 1                    | (1.7) | 0.68            | 2.31 | (0.27–108.16) |
| <i>FGFR3</i>      | 3                   | (1.9)  | 1                    | (1.7) | 1               | 1.13 | (0.09–60.54)  |
| <i>FLT3</i>       | 2                   | (1.3)  | 0                    | (0)   | 1               | Inf  | (0.07-Inf)    |
| <i>HRAS</i>       | 1                   | (0.6)  | 0                    | (0)   | 1               | Inf  | (0.01-Inf)    |
| <i>IDH1</i>       | 1                   | (0.6)  | 1                    | (1.7) | 0.47            | 0.38 | (0–29.8)      |
| <i>KRAS</i>       | 8                   | (5)    | 6                    | (10)  | 0.22            | 0.48 | (0.14–1.75)   |
| <i>MDM2</i>       | 5                   | (3.1)  | 4                    | (6.7) | 0.26            | 0.46 | (0.09–2.38)   |
| <i>MET</i>        | 2                   | (1.3)  | 1                    | (1.7) | 1               | 0.75 | (0.04–45.08)  |
| <i>NF1</i>        | 5                   | (3.1)  | 3                    | (5)   | 0.69            | 0.62 | (0.12–4.11)   |
| <i>PIK3CA</i>     | 6                   | (3.8)  | 3                    | (5)   | 0.71            | 0.75 | (0.15–4.76)   |
| <i>PTEN</i>       | 14                  | (8.8)  | 2                    | (3.3) | 0.25            | 2.79 | (0.61–26.06)  |
| <i>TSC1</i>       | 1                   | (0.6)  | 0                    | (0)   | 1               | Inf  | (0.01-Inf)    |

Data are expressed as number (%). Statistical tests were performed using the chi-square test for the presence of Actionability and the Fisher test for each gene;  $P < 0.05$  is considered statistically significant. Abbreviations: OR: odd ratio; CI: confidential interval.



**Supplementary Table 9: Comparison between actionable genes and lymph node metastasis**

|                   | Lymph metastasis (+)<br><i>n</i> = 77 |        | Lymph metastasis (-) <i>n</i> = 138 |        | <i>P</i> -value | OR   | 95% CI        |
|-------------------|---------------------------------------|--------|-------------------------------------|--------|-----------------|------|---------------|
| Actionability (+) | 27                                    | (35.1) | 46                                  | (33.3) | 0.91            | 1.08 | (0.6–1.94)    |
| <i>ALK</i>        | 0                                     | (0)    | 3                                   | (2.2)  | 0.55            | 0    | (0–4.34)      |
| <i>ATM</i>        | 0                                     | (0)    | 2                                   | (1.4)  | 0.54            | 0    | (0–9.55)      |
| <i>BRAF</i>       | 2                                     | (2.6)  | 4                                   | (2.9)  | 1               | 0.89 | (0.08–6.41)   |
| <i>BRCA1</i>      | 0                                     | (0)    | 2                                   | (1.4)  | 0.54            | 0    | (0–9.55)      |
| <i>BRCA2</i>      | 1                                     | (1.3)  | 2                                   | (1.4)  | 1               | 0.01 | (17.46–0.9)   |
| <i>CDK4</i>       | 0                                     | (0)    | 4                                   | (2.9)  | 0.3             | 0    | (0–2.71)      |
| <i>CDKN2A</i>     | 7                                     | (9.1)  | 7                                   | (5.1)  | 0.26            | 1.87 | (0.53–6.51)   |
| <i>EGFR</i>       | 1                                     | (1.3)  | 1                                   | (0.7)  | 1               | 1.8  | (0.02–142.36) |
| <i>ERBB2</i>      | 3                                     | (3.9)  | 5                                   | (3.6)  | 1               | 1.08 | (0.16–5.72)   |
| <i>FGFR1</i>      | 1                                     | (1.3)  | 3                                   | (2.2)  | 1               | 0.59 | (0.01–7.54)   |
| <i>FGFR2</i>      | 2                                     | (2.6)  | 5                                   | (3.6)  | 1               | 0.71 | (0.07–4.47)   |
| <i>FGFR3</i>      | 0                                     | (0)    | 4                                   | (2.9)  | 0.3             | 0    | (0–2.71)      |
| <i>FLT3</i>       | 0                                     | (0)    | 2                                   | (1.4)  | 0.54            | 0    | (0–9.55)      |
| <i>HRAS</i>       | 1                                     | (1.3)  | 0                                   | (0)    | 0.36            | Inf  | (0.05–Inf)    |
| <i>IDH1</i>       | 0                                     | (0)    | 2                                   | (1.4)  | 0.54            | 0    | (0–9.55)      |
| <i>KRAS</i>       | 4                                     | (5.2)  | 10                                  | (7.2)  | 0.77            | 0.7  | (0.16–2.55)   |
| <i>MDM2</i>       | 2                                     | (2.6)  | 7                                   | (5.1)  | 0.49            | 0.5  | (0.05–2.72)   |
| <i>MET</i>        | 0                                     | (0)    | 3                                   | (2.2)  | 0.55            | 0    | (0–4.34)      |
| <i>NF1</i>        | 2                                     | (2.6)  | 6                                   | (4.3)  | 0.71            | 0.59 | (0.06–3.39)   |
| <i>PIK3CA</i>     | 2                                     | (2.6)  | 7                                   | (5.1)  | 0.49            | 0.5  | (0.05–2.72)   |
| <i>PTEN</i>       | 6                                     | (7.8)  | 10                                  | (7.2)  | 1               | 1.08 | (0.31–3.45)   |
| <i>TSC1</i>       | 0                                     | (0)    | 1                                   | (0.7)  | 1               | 0    | (0–69.82)     |

Data are expressed as number (%). Statistical tests were performed using the chi-square test for the presence of Actionability and the Fisher test for each gene;  $P < 0.05$  is considered statistically significant. Abbreviations: OR: odd ratio; CI: confidential interval.

**Supplementary Table 10: Characteristics of patients with TMB  $\geq$  20.4 mutations/Mbp for targeted sequencing**

| ID      | Subtype | Sex | Age | Number of SNV | Number of Indel | TMB  | Actionable genes   |
|---------|---------|-----|-----|---------------|-----------------|------|--------------------|
| RK428   | ICC     | M   | 77  | 19            | 0               | 96.9 | None               |
| RK426   | ICC     | F   | 63  | 18            | 0               | 91.8 | <i>BRAF, BRCA2</i> |
| RK368   | ICC     | M   | 68  | 9             | 0               | 45.9 | <i>BRCA2, KRAS</i> |
| HK130   | PHC     | F   | 70  | 4             | 2               | 30.6 | None               |
| PAXno6  | GBC     | F   | 69  | 6             | 0               | 30.6 | None               |
| HK112   | DCC     | F   | NA  | 6             | 0               | 30.6 | None               |
| PAXno9  | DCC     | M   | 79  | 6             | 0               | 30.6 | None               |
| HK134   | PHC     | F   | 73  | 4             | 1               | 25.5 | None               |
| HK156   | PHC     | F   | 77  | 4             | 1               | 25.5 | <i>NF1</i>         |
| PAXno14 | DCC     | M   | 66  | 4             | 1               | 25.5 | None               |
| RK370   | ICC     | M   | 77  | 3             | 2               | 25.5 | <i>FGFR2</i>       |
| HK150   | PHC     | F   | 49  | 4             | 0               | 20.4 | <i>BRAF</i>        |
| PAXno4  | PHC     | M   | 66  | 4             | 0               | 20.4 | <i>KRAS</i>        |
| HK137   | DCC     | M   | 70  | 4             | 0               | 20.4 | <i>KRAS</i>        |
| HK146   | DCC     | F   | 81  | 4             | 0               | 20.4 | <i>KRAS</i>        |
| PAXno15 | DCC     | M   | 71  | 4             | 0               | 20.4 | <i>CDKN2A</i>      |
| RK306   | ICC     | M   | 54  | 3             | 1               | 20.4 | <i>CDKN2A</i>      |
| RK427   | ICC     | F   | 78  | 3             | 1               | 20.4 | None               |

Abbreviations: TMB: tumor mutation burden; ICC: intrahepatic cholangiocarcinoma; PHC: perihilar cholangiocarcinoma; CDC: cystic duct carcinoma; GBC: gallbladder carcinoma; DCC: distal cholangiocarcinoma.

**Supplementary Table 11: Characteristics of patients with biliary tract cancer for RNA sequencing**

|                                               | RNA sequencing ( <i>n</i> = 115) |         |
|-----------------------------------------------|----------------------------------|---------|
| Age, years                                    |                                  |         |
| Median (range)                                | 70                               | (47–86) |
| Sex                                           |                                  |         |
| Male                                          | 81                               | (70.4)  |
| Female                                        | 34                               | (29.6)  |
| The location of BTC                           |                                  |         |
| ICC                                           | 20                               | (17.4)  |
| PHC                                           | 27                               | (23.5)  |
| CDC/ GBC                                      | 36                               | (31.3)  |
| DCC                                           | 32                               | (27.8)  |
| Pathological lymph node metastasis            |                                  |         |
| (–)                                           | 69                               | (60)    |
| (+)                                           | 44                               | (38.3)  |
| NA                                            | 2                                | (1.7)   |
| Pathological Stage according to AJCC/UICC 7th |                                  |         |
| I                                             | 18                               | (15.7)  |
| II                                            | 35                               | (30.4)  |
| III                                           | 41                               | (35.7)  |
| IV                                            | 20                               | (17.4)  |
| NA                                            | 1                                | (0.9)   |
| Histology                                     |                                  |         |
| Tubular adenocarcinoma                        | 94                               | (81.7)  |
| Poorly differentiated adenocarcinoma          | 14                               | (12.2)  |
| Adenosquamous adenocarcinoma                  | 2                                | (1.7)   |
| Mucinous adenocarcinoma                       | 1                                | (0.9)   |
| Others                                        | 1                                | (0.9)   |
| NA                                            | 3                                | (2.6)   |

Data are expressed as number (%) or median (minimum value – maximum value). Abbreviations: BTC: bile duct carcinoma; ICC: intrahepatic cholangiocarcinoma; PHC: perihilar cholangiocarcinoma; CDC: cystic duct carcinoma; GBC: gallbladder carcinoma; DCC: distal cholangiocarcinoma; NA: not available.
